# Supplementary material for: Digital Surveillance to Identify California Alternative and Emerging Tobacco Industry Policy Influence and Mobilization on Facebook
Source: MDPI journal article supplement (doi:10.3390/ijerph182111150), 2021-10-23
Supplement: s1 [file s1]

## Supplementary File

**Figure S1: Facebook posts engagements typologies.**

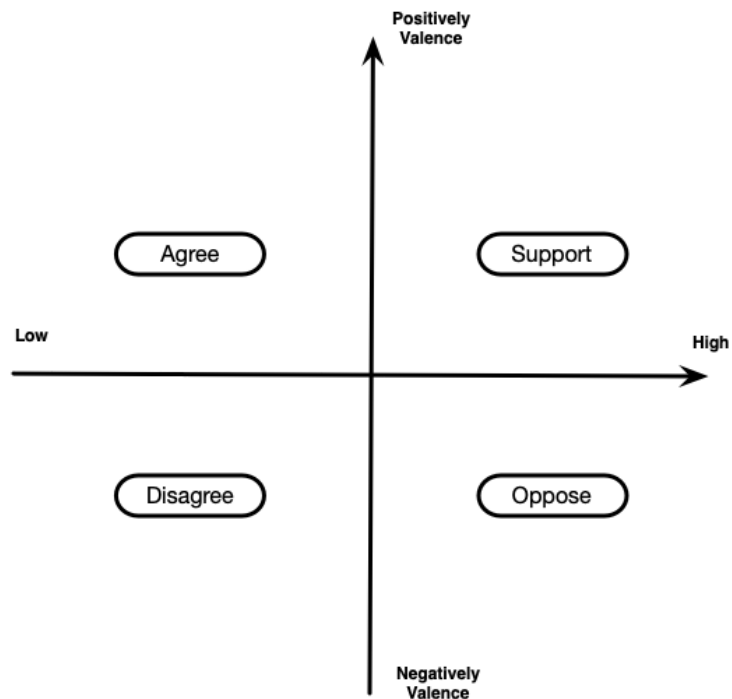

**Description:** The vertical axes represent the attitude toward to posts which opposes the tobacco control policy, and the abscissa axis represent the active level of the engagement. positive engagement levels are high active (Support) and low active (Agree) and negative engagement levels are also high active (Oppose) and low active (Disagree) resulting in classification of different engagement behavior that varies in intensity and valence

**Table S1. Inductive code list**

| <b>CODE</b>                     | <b>SUBCODE</b>                  | <b>DESCRIPTION</b>                                                                                                                                                                            |
|---------------------------------|---------------------------------|-----------------------------------------------------------------------------------------------------------------------------------------------------------------------------------------------|
| <b>Call to political action</b> | advocate                        | Call to action is general advocacy                                                                                                                                                            |
|                                 | appear                          | Call to action to appear at some event (policy meeting, rally, etc.)                                                                                                                          |
|                                 | call                            | Call to action to make a phone call                                                                                                                                                           |
|                                 | donate money                    | Call to action to donate money to an organization                                                                                                                                             |
|                                 | face to face with policymakers  | Call to action for face to face contact with policymakers (e.g., lobbying, legislative visit, etc.). Does not include appearing at meetings.                                                  |
|                                 | inform non-policy makers        | Call to action to inform, talk to, dialogue with non-policy makers (e.g., friends, family) about vaping. Purpose is to sway public opinion to increase acceptability of vaping.               |
|                                 | join organization               | Call to action to join the posting organization (CCASAA or NC-SFATA or parent organizations) or other related organizations                                                                   |
|                                 | lawsuit (as party or supporter) | Call to action related to legal intervention                                                                                                                                                  |
|                                 | moderate Facebook group         | Call to action to moderate the Facebook group                                                                                                                                                 |
|                                 | public comment                  | Call to action to make a public comment about vaping (setting is not specified). Comment can be in writing or verbal.                                                                         |
|                                 | purchase merchandise            | Call to action to purchase merchandise of some type.                                                                                                                                          |
|                                 | share testimonial               | Call to action to share testimonial as a personal experience related to vaping or as a retailer. Sharing can be in policy arena, to others interpersonally, or publicly in non-policy setting |
|                                 | subscribe_newsletter            | Call to action to subscribe to a newsletter                                                                                                                                                   |
|                                 | survey participation            | Call to action to participate in a survey                                                                                                                                                     |
|                                 | vote                            | Call to action to vote                                                                                                                                                                        |
|                                 | website blackout                | Call to action to alter (retail) website to be blacked out                                                                                                                                    |
|                                 | write                           | Call to action to write (email, letter, web post, other) to a policymaker or other decision making audience.                                                                                  |
| <b>SHARE: Action taken</b>      | action taken_call               | Describes advocacy call made by an individual                                                                                                                                                 |

|                                   |                                          |                                                                                          |
|-----------------------------------|------------------------------------------|------------------------------------------------------------------------------------------|
|                                   | action taken_testify                     | Describes advocacy testimony made by an individual                                       |
|                                   | action taken_write                       | Describes written advocacy action taken by an individual                                 |
| <b>SHARE: Advocacy experience</b> | experience with advocacy_negative        | Negative experience an individual has in the process of engaging in advocacy             |
|                                   | experiences with advocacy                | Experience an individual has in the process of engaging in advocacy                      |
| <b>SHARE: Event</b>               | industry event                           | E-cigarette industry event not related to the parent organization (e.g., CASAA or SFATA) |
|                                   | invitation_advocacy_federal              | Invitation to participate in a federal advocacy event.                                   |
|                                   | invitation_advocacy_state                | Invitation to participate in a state advocacy event.                                     |
|                                   | invitation_sfata meeting                 | Invitation to attend a SFATA chapter meeting or SFATA-sponsored event                    |
| <b>SHARE: Misc</b>                | anti-vaping material                     | Anti-vaping material (print or video).                                                   |
|                                   | consumer information                     | Information for consumers related to vaping behavior and not about policy issues         |
|                                   | information_CA political districts       | Information on California political districts                                            |
|                                   | presentation on vaping                   | Information about a presentation about vaping being given.                               |
|                                   | presidential candidate position on ecigs | Information on Democratic nominees for president summarizing views on vaping regulation  |
|                                   | response from policymaker                | Response from a policymaker regarding advocacy effort on vaping issue                    |
|                                   | running for president                    | Facebook group member campaigning for President                                          |
|                                   | vape paraphernalia                       | Vape paraphernalia                                                                       |
| <b>SHARE: News</b>                | news_adverse outcomes                    | News about adverse outcomes related to vaping                                            |
|                                   | news_increase in vaping                  | News about increases in vaping                                                           |
|                                   | news_vape shops                          | News related to vape shops                                                               |
|                                   | news_youth vaping                        | News related to youth vaping                                                             |
|                                   | newsletter                               | Organizational newsletter (or link to a newsletter).                                     |
| <b>SHARE: Opinion</b>             | opinion_others smoking behavior          | Opinion expressed about the smoking behavior of another person                           |
|                                   | opinion_policies                         | Opinion expressed about vaping related policy/policies                                   |

|                                     |                               |                                                                                                                                                                                                             |
|-------------------------------------|-------------------------------|-------------------------------------------------------------------------------------------------------------------------------------------------------------------------------------------------------------|
| <b>SHARE: Organizational action</b> |                               | Documentation of organizational activity (CCASAA or NC-SFATA) (e.g., hosting events, paid media articles, public testimony, giving interviews, lobbying, etc.) to advance the organization's mission.       |
| <b>SHARE: Other groups</b>          | organizational websites       | Information or links to the organizational website                                                                                                                                                          |
|                                     | other pro-vape organization   | Information about or links to other pro-vape organizations                                                                                                                                                  |
|                                     | tobacco control group actions | Actions of tobacco control advocates                                                                                                                                                                        |
| <b>SHARE: Policy update</b>         | policy update                 | Policy update, but the level of government not specified.                                                                                                                                                   |
|                                     | policy update_federal         | Policy update at the federal level.                                                                                                                                                                         |
|                                     | policy update_local           | Policy update at the local level.                                                                                                                                                                           |
|                                     | policy update_retail          | Policy update related to retailers                                                                                                                                                                          |
|                                     | policy update_state           | Policy update at the state level.                                                                                                                                                                           |
| <b>SHARE: Retail</b>                | retailer information          | Information for retailers for conduct of business (e.g., how to be in compliance with regulatory or tax laws).                                                                                              |
|                                     | retailer practices            | Other retailer's business practices.                                                                                                                                                                        |
| <b>SHARE: Science</b>               |                               | Science of vaping (including medical information, epidemiological information, interpretation of data of study findings, results of studies, or other discussions about "evidence" for and against vaping). |

**Table S2. Local ordinances and state and federal legislation discussed in Facebook groups.**

| <b>Organization</b> | <b>Local Ordinances</b>                                                                                                                                                                                                                                                                                                                                                                                                                                                                                                                                                                                                                                                                                    | <b>California</b>                                                                                                               | <b>Federal</b>                                                                                                                                                                                                              |
|---------------------|------------------------------------------------------------------------------------------------------------------------------------------------------------------------------------------------------------------------------------------------------------------------------------------------------------------------------------------------------------------------------------------------------------------------------------------------------------------------------------------------------------------------------------------------------------------------------------------------------------------------------------------------------------------------------------------------------------|---------------------------------------------------------------------------------------------------------------------------------|-----------------------------------------------------------------------------------------------------------------------------------------------------------------------------------------------------------------------------|
| CCASSA              | <u>Cities:</u><br><br>Adelanto<br>Albany<br>Alturas<br>Anderson<br>Arroyo Grande<br>Auburn<br>Belmont Beverly Hills<br>Burbank<br>Burlingame, Capitola<br>Carpinteria<br>Cerritos<br>Chico<br>Chino<br>Chula Vista<br>Concord<br>Coronado<br>Culver City<br>Cupertino<br>Danville<br>Davis<br>El Cajon<br>El Monte<br>Fremont<br>Grand Terrace<br>Hawaiian Gardens<br>Hermosa Beach<br>Imperial Beach<br>Irvine<br>Lafayette<br>Laguna Niguel<br>Larkspur Ontario<br>Livermore<br>Long Beach<br>Loomis<br>Los Angeles<br>Los Gatos, Mammoth<br>Lakes<br>Manhattan Beach<br>Menlo Park<br>Mill Valley<br>Morgan Hill<br>Morro Bay<br>Oakland<br>Oroville<br>Oxnard<br>Pacifica<br>Pacific Grove<br>Palmdale | A.B. 131 (2017-18)<br>A.B. 1639 (2019-20)<br>S.B. 38 (2019-20)<br>S.B. 39 (2019-20)<br>S.B. 538 (2019-20)<br>S.B. 793 (2019-20) | H.R. 293 (2019-20)<br>H.R. 2411 (2019-20)<br>FDA Tobacco Product<br>Standard for Nicotine<br>Level of Combusted<br>Cigarettes propose<br>rulemaking<br>Objection to OMB<br>regarding CDC “Tips<br>from Smokers”<br>campaign |

|  |                                                                                                                                                                                                                                                                                                                                                                                                                                                                                                                                                                                                                                                                                                                                                                                                                                               |  |  |
|--|-----------------------------------------------------------------------------------------------------------------------------------------------------------------------------------------------------------------------------------------------------------------------------------------------------------------------------------------------------------------------------------------------------------------------------------------------------------------------------------------------------------------------------------------------------------------------------------------------------------------------------------------------------------------------------------------------------------------------------------------------------------------------------------------------------------------------------------------------|--|--|
|  | Palo Alto<br>Pasadena<br>Pismo Beach<br>Pittsburg<br>Pleasanton<br>Pomona<br>Rancho Mirage<br>Redondo Beach<br>Redwood City<br>Richmond<br>Sacramento<br>Saint Helena<br>San Anselmo<br>San Carlos<br>San Clemente<br>San Jose<br>San Juan Capistrano<br>San Luis Obispo<br>San Marcos<br>San Mateo<br>San Rafael<br>Santa Maria<br>Santa Monica<br>Seaside<br>Solana Beach<br>Solvang<br>Sunnyvale<br>Upland<br>Torrance<br>Tracy<br>Ventura<br>Visalia<br>Watsonville<br>West Hollywood<br>West Sacramento<br>Woodland<br><br>Counties:<br><br>Alameda County<br>Butte County<br>Contra Costa County<br>Lake County<br>Los Angeles County<br>Marin County<br>Sacramento County<br>San Francisco County<br>San Diego County<br>San Luis Obispo County<br>San Mateo County<br>Santa Barbara County<br>Santa Clara County<br>Santa Cruz County |  |  |
|--|-----------------------------------------------------------------------------------------------------------------------------------------------------------------------------------------------------------------------------------------------------------------------------------------------------------------------------------------------------------------------------------------------------------------------------------------------------------------------------------------------------------------------------------------------------------------------------------------------------------------------------------------------------------------------------------------------------------------------------------------------------------------------------------------------------------------------------------------------|--|--|

|          |                                                                                                                   |                                                                                                                                                                                                          |                                            |
|----------|-------------------------------------------------------------------------------------------------------------------|----------------------------------------------------------------------------------------------------------------------------------------------------------------------------------------------------------|--------------------------------------------|
|          | Shasta County<br>Sonoma County<br>Ventura County                                                                  |                                                                                                                                                                                                          |                                            |
| NC-SFATA | Sonoma<br>Turlock<br>Yountville<br><br>Alameda County<br>Contra Costa County<br>San Mateo County<br>Shasta County | A.B.X. 26 (2015-16)<br>A.B. 768 (2015-16)<br>A.B. 1594 (2015-16)<br>S.B. 24 (2015-16)<br>S.B.X. 25 (2015-16)<br>S.B. 140 (2015-16)<br>S.B. 151 (2015-16)<br>S.B. 1333 (2015-16)<br>Proposition 56 (2016) | H.R. 2058 (2015-16)<br>H.R. 1136 (2015-16) |

**Table S3: Examples of industry interference Facebook post themes**

| Political interference type | Code                       | Subcode                           | CCASAA (number of posts) | NCSFATA (number of posts) |
|-----------------------------|----------------------------|-----------------------------------|--------------------------|---------------------------|
| Information                 | Call to political action   | advocate                          | 5                        | 0                         |
|                             |                            | appear                            | 40                       | 11                        |
|                             |                            | call                              | 16                       | 7                         |
|                             |                            | face to face with policymakers    | 1                        | 5                         |
|                             |                            | inform non-policy makers          | 1                        |                           |
|                             |                            | public comment                    | 7                        | 2                         |
|                             |                            | share testimonial                 | 8                        | 0                         |
|                             |                            | vote                              | 2                        | 6                         |
|                             |                            | website blackout                  | 0                        | 1                         |
|                             |                            | write                             | 47                       | 6                         |
|                             | SHARE: Event               | invitation_advocacy_federal       | 0                        | 3                         |
|                             |                            | invitation_advocacy_state         | 0                        | 3                         |
|                             |                            | invitation_sfata meeting          | 0                        | 36                        |
|                             | SHARE: Science             |                                   | 38                       | 14                        |
|                             | SHARE: Action taken        | action taken_call                 | 1                        | 0                         |
|                             |                            | action taken_testify              | 0                        | 1                         |
|                             |                            | action taken_write                | 1                        | 0                         |
|                             | SHARE: Advocacy experience | experience with advocacy_negative | 2                        | 0                         |
|                             |                            | experiences with advocacy         | 3                        | 5                         |
| Policy substitution         | SHARE: Opinion             | opinion_policies                  | 34                       | 17                        |
| Constituency building       | SHARE: Other groups        | organizational websites           | 1                        | 1                         |
|                             |                            | other pro-vape organization       | 3                        | 2                         |
|                             | SHARE: Policy update       | policy update                     | 4                        | 1                         |
|                             |                            | policy update_federal             | 13                       | 12                        |
|                             |                            | policy update_local               | 233                      | 22                        |
|                             |                            | policy update_retail              | 1                        | 0                         |
|                             |                            | policy update_state               | 56                       | 25                        |
|                             | Call to action             | join organization                 | 38                       | 2                         |
| Legal                       | Call to action             | lawsuit (as party or supporter)   | 3                        | 1                         |
